# Supplementary material
Source: Elsevier journal article supplement (https://www.sciencedirect.com/science/article/pii/S1413867021000027)
Supplement: mmc1 [file S1413867021000027:mmc1.docx]

**Appendix A.**

**Figure 2**


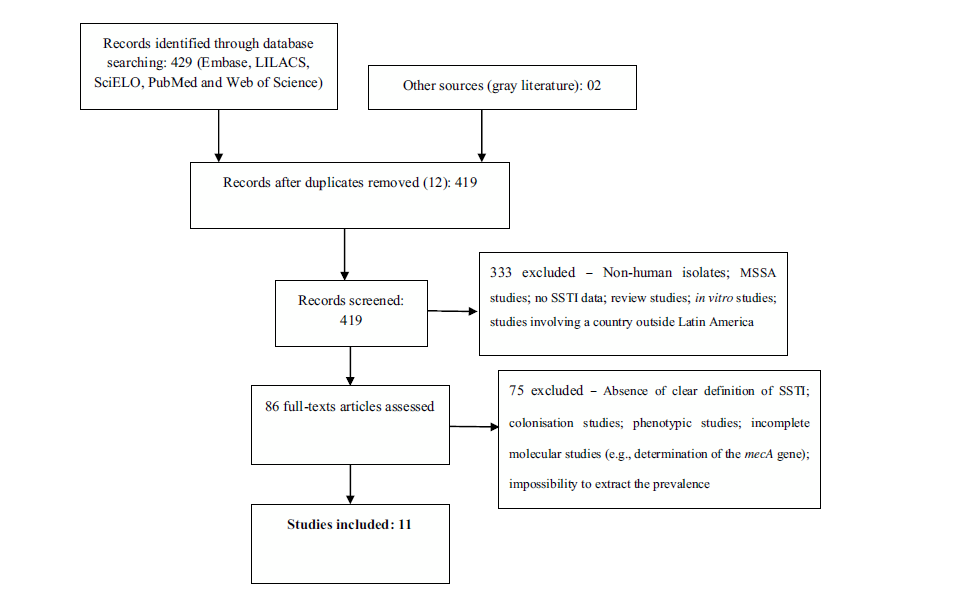


Search strategy:

Table A1 – Search strategy - Embase.

Table A2 – Search strategy - LILACS (spanish).

Table A3 – Search strategy - LILACS (spanish).

Table A4 – Search strategy - LILACS (portuguese).

Table A5 – Search strategy - PubMed.

Table A6 – Search strategy - ScieLo (english).

Table A7 – Search strategy - ScieLo (spanish).

Table A8 – Search strategy - ScieLo (portuguese).

Table A9 – Search strategy - Web of Science.

Supplementary Data:

Table A10 – Risk of bias in included studies (Joanna-Briggs Institute’s critical appraisal checklist model).

Table A11 - Proportion of CO-SSTI in infections due to CG-MRSA.

Table A12 - Risk factors associated with CG-MRSA CO-SSTI.

List of Tables

**Table A1. Search strategy - Embase.**

| **Steps** | **Search strategy** | **Results** |
| --- | --- | --- |
| 1 | ('staphylococcus aureus':ab,ti OR 'methicillin resistant staphylococcus aureus':ab,ti OR 'community acquired methicillin resistant staphylococcus aureus':ab,ti OR 'community associated methicillin resistant staphylococcus aureus':ab,ti OR mrsa:ab,ti OR 'ca mrsa':ab,ti OR 'cg mrsa':ab,ti OR 'community-acquired mrsa':ab,ti OR 'community-associated mrsa':ab,ti) AND [2002-2020]/py | 97.160 |
| 2 | (abscess:ab,ti OR 'bacterial skin disease':ab,ti OR pyomyositis:ab,ti OR cellulitis:ab,ti OR 'soft tissue infection':ab,ti OR 'necrotizing fasciitis':ab,ti OR 'wound infection':ab,ti OR erysipelas:ab,ti OR 'skin infection':ab,ti OR carbuncle:ab,ti OR 'diabetic foot':ab,ti OR 'diabetic foot infection':ab,ti OR ('complicated skin':ab,ti AND 'skin structure infection':ab,ti) OR ('acute bacterial skin':ab,ti AND 'skin structure infection':ab,ti) OR absssi:ab,ti OR sssi:ab,ti OR ssti:ab,ti OR csssi:ab,ti OR cssti:ab,ti OR impetigo:ab,ti OR furunculosis:ab,ti OR 'staphylococcal skin infection':ab,ti OR ('complicated skin':ab,ti AND 'soft tissue infection':ab,ti)) AND [2002-2020]/py | 58.142 |
| 3 | (brazil:ab,ti OR argentina:ab,ti OR uruguay:ab,ti OR paraguay:ab,ti OR chile:ab,ti OR peru:ab,ti OR bolivia:ab,ti OR ecuador:ab,ti OR colombia:ab,ti OR venezuela:ab,ti OR 'latin american':ab,ti OR 'french guiana':ab,ti OR guyana:ab,ti OR 'costa rica':ab,ti OR nicaragua:ab,ti OR haiti:ab,ti OR honduras:ab,ti OR cuba:ab,ti OR panama:ab,ti OR guatemala:ab,ti OR mexico:ab,ti OR 'dominican republic':ab,ti OR suriname:ab,ti OR 'central america':ab,ti OR 'south america':ab,ti) AND [2002-2020]/py | 195.793 |
| 4 | 1 and 2 and 3 | 55 |
| 6 | Search on 03/23/2020 | |

**Table A2. Search strategy - LILACS (english).**

| **Steps** | **Search strategy** | **Results** |
| --- | --- | --- |
| 1 | tw:((tw:((mh:("staphylococcus aureus")) OR (mh:("methicillin-resistant staphylococcus aureus")) OR (tw:("community-acquired-mrsa")) OR (tw:("community-associated-mrsa")) OR (mh:("mrsa")) OR (tw:("ca-mrsa")) OR (tw:("cg-mrsa")))) | 447 |
| 2 | (tw:((mh:("abscess")) OR (mh:("skin disease, bacterial")) OR (mh:("pyomyositis")) OR (mh:("cellulitis")) OR (mh:("soft tissue infection")) OR (mh:("fasciitis, necrotizing")) OR (mh:("wound infection, surgical")) OR (mh:("erysipelas")) OR (mh:("skin disease, infectious")) OR (mh:("carbuncle")) OR (mh:(foot ulcer, diabetic)) OR (tw:(complicated skin AND skin structure infection)) OR (tw:(complicated skin AND soft tissue infection)) OR (tw:(acute bacterial skin AND skin structure infection)) OR (tw:("absssi")) OR (tw:("sssi")) OR (tw:("ssti")) OR (tw:("csssi")) OR (tw:("cssti")) OR or (mh:("impetigo")) OR (mh:("furunculosis")) OR (tw:(staphylococcal skin infections)) )) | 39.425 |
| 3 | (tw:((mh:("brazil")) OR (mh:("argentina")) OR (mh:("uruguay")) OR (mh:("paraguay")) OR (mh:("chile")) OR (mh:("peru")) OR (mh:("bolivia")) OR (mh:("ecuador")) OR (mh:("colombia")) OR (mh:("venezuela")) OR (mh:("latin america")) OR (mh:("french guiana")) OR (mh:("guyana")) OR (mh:("costa rica")) OR (mh:("nicaragua")) OR (mh:("haiti")) OR (mh:("honduras")) OR (mh:("cuba")) OR (mh:("panama")) OR (mh:("guatemala")) OR (mh:("mexico")) OR (mh:("dominican republic")) OR (mh:("suriname")) OR (mh:("central america")) OR (mh:("south america")) ))) | 16.365 |
| 4 | db:("LILACS") AND la:("en")) AND (year_cluster:[2002 TO 2020]) | --- |
|  | 1 and 2 and 3 and 4 | 36 |
| 6 | Search on 03/22/2020 | |

**Table A3. Search strategy - LILACS (spanish).**

| **Steps** | **Search strategy** | **Results** |
| --- | --- | --- |
| 1 | (tw:((mh:("staphylococcus aureus")) OR (mh:("staphylococcus aureus resistente a meticilina")) OR (tw:("staphylococcus aureus resistente a la meticilina")) OR (tw:(“staphylococcus aureus resistente a oxacilina”)) OR (tw:( staphylococcus aureus resistente a la meticilina adquirido en la comunidad)) OR (tw:("sarm")) OR (tw:("sarm-ac")) OR (tw:("cg-mrsa")) OR (tw:(”orsa”)))) | 432 |
| 2 | tw:(tw:(tw:((tw:(tw:((tw:((mh:("absceso")) OR (mh:("celulitis (flemon)")) OR (mh:("piomiositis")) OR (mh:("enfermedades cutaneas infecciosas")) OR (mh:("infecciones cutaneas estafilococicas")) OR (mh:("enfermedades cutaneas bacterianas")) OR (mh:("erisipela")) OR (mh:("antrax")) OR (mh:(pie diabetico)) OR (mh:("forunculosis")) OR (mh:("impetigo")) OR (mh:("infeccion de la herida quirurgica")) OR (mh:("infecciones de los tejidos blandos")) OR (tw:("infeccion de piel y partes blandas")) OR (mh:("mastitis"))))) | 464 |
| 3 | (tw:((mh:("brasil")) OR (mh:("argentina")) OR (mh:("uruguay")) OR (mh:("paraguay")) OR (mh:("chile")) OR (mh:("perú")) OR (mh:("bolivia")) OR (mh:("ecuador")) OR (mh:("colombia")) OR (mh:("venezuela")) OR (mh:("américa latina")) OR (mh:("guyana francesa")) OR (mh:("guyana")) OR (mh:("costa rica")) OR (mh:("nicaragua")) OR (mh:("haití")) OR (mh:("honduras")) OR (mh:("cuba")) OR (mh:("panamá")) OR (mh:("guatemala")) OR (mh:("méxico")) OR (mh:("república dominicana")) OR (mh:("suriname")) OR (mh:("américa central")) OR (mh:("américa del sur")) ))))) | 33.084 |
| 4 | AND ( db:("LILACS") AND la:("es")) AND (year_cluster:[2002 TO 2020]) | --- |
| 5 | 1 and 2 and 3 and 4 | 8 |
| 6 | Search em 03/22/2020 | |

**Table A4. Search strategy - LILACS (portuguese).**

| **Steps** | **Search strategy** | **Results** |
| --- | --- | --- |
| 1 | (mh:("staphylococcus aureus")) OR (mh:("staphylococcus aureus resistente a meticilina")) OR (tw:(“staphylococcus aureus resistente a oxacilina”)) OR (mh:(staphylococcus aureus meticilino resistente adquirido na comunidade)) OR (tw:("sarm")) OR (tw:("sarm-ac")) OR (tw:("cg-mrsa")) OR (tw:(”orsa”)) | 410 |
| 2 | (mh:("abscesso")) OR (mh:("celulite")) OR (mh:("piomiosite")) OR (mh:("dermopatias infecciosas")) OR (mh:("dermopatias bacterianas")) OR (mh:("infecções cutâneas estafilocócicas")) OR (mh:("erisipela")) OR (mh:("carbúnculo")) OR (mh:("úlcera diabética do pé")) OR (mh:("furunculose")) OR (mh:("impetigo")) OR (mh:("infecção da ferida cirúrgica")) OR (mh:(“infecções dos tecidos moles”)) OR (tw:("infecção de pele e partes moles")) OR (mh:(“mastite)) | 415 |
| 3 | (mh:("brasil")) OR (mh:("argentina")) OR (mh:("uruguai")) OR (mh:("paraguai")) OR (mh:("chile")) OR (mh:("peru")) OR (mh:("bolívia")) OR (mh:("equador")) OR (mh:("colômbia")) OR (mh:("venezuela")) OR (mh:("américa latina")) OR (mh:("guiana francesa")) OR (mh:("guiana")) OR (mh:("costa rica")) OR (mh:("nicarágua")) OR (mh:("haiti")) OR (mh:("honduras")) OR (mh:("cuba")) OR (mh:("panamá")) OR (mh:("guatemala")) OR (mh:("méxico")) OR (mh:("república dominicana")) OR (mh:("suriname")) OR (mh:("américa central")) OR (mh:("américa do sul")) | 23.934 |
| 4 | AND ( db:("LILACS") AND la:("pt")) AND (year_cluster:[2002 TO 2020]) | --- |
| 5 | 1 and 2 and 3 and 4 | 01 |
| 6 | Search on 03/22/2020 | |

**Table A5. Search strategy - PubMed.**

| **Steps** | **Search strategy** | **Results** |
| --- | --- | --- |
| 1 | Search ((((((((((("staphylococcus aureus"[MeSH Terms]) OR "methicillin resistant staphylococcus aureus"[MeSH Terms]) OR "community acquired methicillin resistant staphylococcus aureus"[Title/Abstract]) OR "community associated methicillin resistant staphylococcus aureus"[Title/Abstract]) OR "mrsa"[Title/Abstract]) OR "ca mrsa"[Title/Abstract]) OR "cg mrsa"[Title/Abstract]) OR "community acquired mrsa"[Title/Abstract]) OR "community associated mrsa"[Title/Abstract])) | 79.895 |
| 2 | (((((((((((((((((((("abscess"[MeSH Terms]) OR "skin diseases, bacterial"[MeSH Terms]) OR "soft tissue infections"[MeSH Terms])) OR "cellulitis"[MeSH Terms]) OR "fasciitis, necrotizing"[MeSH Terms]) OR "surgical wound infection"[MeSH Terms]) OR "erysipelas"[MeSH Terms]) OR "skin diseases, infectious"[MeSH Terms]) OR "carbuncle"[MeSH Terms]) OR "diabetic foot infection") OR ("complicated skin and skin structure infection")) OR ("complicated skin and soft tissue infection")) OR ("acute bacterial skin and skin structure infection")) OR "absssi") OR "sssi") OR "ssti") OR "csssi") OR "cssti")))) | 209.028 |
| 3 | ((((((((((((((((((((((((((("brazil"[MeSH Terms]) OR "argentina"[MeSH Terms]) OR "uruguay"[MeSH Terms]) OR "paraguay"[MeSH Terms]) OR "chile"[MeSH Terms]) OR "peru"[MeSH Terms]) OR "bolivia"[MeSH Terms]) OR "ecuador"[MeSH Terms]) OR "colombia"[MeSH Terms]) OR "venezuela"[MeSH Terms]) OR latin america[MeSH Terms])) OR "french guiana"[MeSH Terms]) OR "guyana"[MeSH Terms]) OR "costa rica"[MeSH Terms]) OR "nicaragua"[MeSH Terms]) OR "haiti"[MeSH Terms]) OR "honduras"[MeSH Terms]) OR "cuba"[MeSH Terms]) OR "panama"[MeSH Terms]) OR "guatemala"[MeSH Terms]) OR "mexico"[MeSH Terms]) OR "dominican republic"[MeSH Terms]) OR "suriname"[MeSH Terms]) OR "central america"[MeSH Terms]) OR "south america")) = 229.049 | 229.049 |
| 4 | Filters: Publication date from 2002/01/01 to 2020/02/22 | --- |
| 5 | 1 and 2 and 3 and 4 | 54 |
| 6 | Search on 02/22/2020 | |

**Table A6. Search strategy - SciELO (english).**

| **Steps** | **Search strategy** | **Results** |
| --- | --- | --- |
| 1 | ((subject:staphylococcus aureus) OR (subject:methicillin-resistant staphylococcus aureus) OR (subject:community-acquired methicillin-resistant staphylococcus aureus) OR (subject:community-acquired-mrsa) OR (subject:community-associated methicillin-resistant staphylococcus aureus) OR (subject:community-associated-mrsa) OR (subject:mrsa) OR (subject:camrsa) OR (cg-mrsa)) | 2.622 |
| 2 | ((subject:abscess) OR (subject:skin disease, bacterial) OR (subject:pyomyositis) OR (subject:cellulitis) OR (subject:soft tissue infection) OR (subject:fasciitis,necrotizing) OR (subject:wound infection, surgical) OR (subject:erysipelas) OR (subject:skin disease, infectious) OR (subject:carbuncle) OR (subject:foot ulcer, diabetic) OR (subject:complicated skin AND skin structure infection) OR (subject:complicated skin AND soft tissue infection) OR (subject:acute bacterial skin AND skin structure infection) OR (subject:absssi) OR (subject:sssi) OR (subject:ssti) OR (subject:csssi) OR (subject:cssti) OR (subject:impetigo) OR (subject:furunculosis) OR (subject:staphylococcal skin infections)) | 2.342 |
| 3 | (subject:brazil) OR (subject:argentina) OR (subject:uruguay) OR (subject:paraguay) OR (subject:chile) OR (subject:peru) OR (subject:bolivia) OR (subject:ecuador) OR (subject:colombia) OR (subject:venezuela) OR (subject:latin america) OR (subject:french guiana) OR (subject:guyana) OR (subject:costa rica) OR (subject:nicaragua) OR (subject:haiti) OR (subject:honduras) OR (subject:cuba) OR (subject:panama) OR (subject:guatemala) OR (subject:mexico) OR (subject:dominican republic) OR (subject:suriname) OR (subject:central america) OR (subject:south america) | 215.415 |
| 4 | year_cluster:("2019" OR "2018" OR "2017" OR "2015" OR "2014" OR "2013" OR "2012" OR "2011" OR "2010" OR "2009" OR "2008" OR "2007" OR "2006" OR "2004" OR "2003") | --- |
| 5 | 1 and 2 and 3 and 4 | 45 |
| 6 | Search on 03/22/2020 | |

**Table A7. Search strategy - SciELO (spanish).**

| **Steps** | **Search strategy** | **Results** |
| --- | --- | --- |
| 1 | ((subject:staphylococcus aureus) OR (subject:staphylococcus aureus resistente a meticilina) OR (subject:staphylococcus aureus resistente a la meticilina) OR (subject:staphylococcus aureus resistente a oxacilina) OR (subject:staphylococcus aureus resistente a la meticilina adquirido en la comunidad) OR (subject:sarm) OR (subject:sarm-ac) OR (subsject:cg-mrsa) OR (subject:orsa)) | 2.857 |
| 2 | ((subject:absceso) OR (subject:celulitis) OR (subject:piomiositis) OR (subject:enfermedades cutáneas infecciosas) OR (subject:enfermedades cutáneas bacterianas) OR (subject:infecciones cutáneas estafilocócicas) OR (subject:erisipela) OR (subject:pie diabético) OR (subject:fascitis necrotizante) OR (subject:forunculosis) OR (subject:ántrax) OR (subject:impétigo) OR (subject:infección de la herida quirúrgica) OR (subject:infecciones de los tejidos blandos) OR (subject:infección de piel y partes blandas) OR (subject:mastitis)) | 1.974 |
| 3 | ((subject:brasil) OR (subject:argentina) OR (subject:uruguay) OR (subject:paraguay) OR (subject:chile) OR (subject:perú) OR (subject:bolivia) OR (subject:ecuador) OR (subject:colombia) OR (subject:venezuela) OR (subject:américa latina) OR (subject:guyana francesa) OR (subject:guyana) OR (subject:costa rica) OR (subject:nicaragua) OR (subject:haití) OR (subject:honduras) OR (subject:cuba) OR (subject:panamá) OR (subject:guatemala) OR (subject:méxico) OR (subject:república dominicana) OR (subject:suriname) OR (subject:américa central) OR (subject:américa del sur) ) | 207.364 |
| 4 | and AND year_cluster:("2018" OR "2015" OR "2014" OR "2011" OR "2017" OR "2016" OR "2013" OR "2012" OR "2010" OR "2009" OR "2019" OR "2008" OR "2007" OR "2006" OR "2005" OR "2004" OR "2003" OR "2002") | --- |
| 5 | 1 and 2 and 3 and 4 | 72 |
| 6 | Search on 03/12/2020 | |

**Table A8**. **Search strategy - SciELO (portuguese).**

| **Steps** | **Search strategy** | **Results** |
| --- | --- | --- |
| 1 | ((subject:staphylococcus aureus) OR (subject:staphylococcus aureus resistente à meticilina) OR (subject:staphylococcus aureus resistente a oxacilina) OR (subject:staphylococcus aureus meticilino resistente adquirido na comunidade) OR (subject:sarm) OR (subject:sarm-ac) OR (subject:cg-mrsa) OR (subject:orsa) | 2.857 |
| 2 | (subject:abscesso) OR (subject:celulite) OR (subject:piomiosite) OR (subject:dermopatias infecciosas) OR (subject:dermopatias bacterianas) OR (subject:infecções cutâneas estafilocócicas) OR (subject:erisipela) OR (subject:carbúnculo) OR (subject:úlcera diabética do pé) OR (subject:furunculose) OR (subject:carbúnculo) OR (subject:impetigo) OR (subject:infecção da ferida cirúrgica) OR (subject:infecções dos tecidos moles) OR (subject:infecção de pele e partes moles) OR (subject:mastite) | 995 |
| 3 | (subject:brasil) OR (subject:argentina) OR (subject:uruguai) OR (subject:paraguai) OR (subject:chile) OR (subject:peru) OR (subject:bolívia) OR (subject:equador) OR (subject:colômbia) OR (subject:venezuela) OR (subject:américa latina) OR (subject:Guiana francesa) OR (subject:guiana) OR (subject:costa rica) OR (subject:nicarágua) OR (subject:haiti) OR (subject:honduras) OR (subject:cuba) OR (subject:panamá) OR (subject:guatemala) OR (subject:méxico) OR (subject:república dominicana) OR (subject:suriname) OR (subject:américa central) OR (subject:américa do sul) | 203.605 |
| 4 | and AND year_cluster:("2017" OR "2018" OR "2015" OR "2011" OR "2016" OR "2014" OR "2013" OR "2012" OR "2010" OR "2009" OR "2019" OR "2008" OR "2007" OR "2006" OR "2005" OR "2004" OR "2003" OR "2002") | --- |
| 5 | 1 and 2 and 3 and 4 | 127 |
| 6 | Search on 03/12/2020 | |

**Table A9. Search strategy - Web of Science.**

| **Steps** | **Search strategy** | **Results** |
| --- | --- | --- |
| 1 | (TS= (Staphylococcus aureus OR methicillin resistant staphylococcus aureus OR community acquired methicillin resistant staphylococcus aureus OR community associated methicillin resistant staphylococcus aureus OR community-genotype methicillin resistant Staphylococcus aureus OR MRSA OR CA-MRSA OR CG-MRSA)) AND IDIOMA: (English) AND TIPOS DE DOCUMENTO: (Article)  *Índices=SCI-EXPANDED, SSCI, A&HCI, CPCI-S, CPCI-SSH, ESCI Tempo estipulado=2002-2020* | 90.522 |
| 2 | (TS= (abscess OR skin diseases, bacterial OR soft tissue infections OR cellulitis OR fasciitis, necrotizing OR surgical wound infection OR surgical site infection OR erysipelas OR skin diseases, infectious OR carbuncle OR diabetic foot infection OR complicated skin and skin structure infection OR complicated skin and soft tissue infection OR acute bacterial skin and skin structure infection OR absssi OR sssi OR ssti OR csssi OR cssti OR carbuncle OR diabetic foot infection OR impetigo OR furunculosis OR staphylococcal skin infections)) AND IDIOMA: (English) AND TIPOS DE DOCUMENTO: (Article)  *Índices=SCI-EXPANDED, SSCI, A&HCI, CPCI-S, CPCI-SSH, ESCI Tempo estipulado=2002-2020* | 66.329 |
| 3 | (TS=(Latin America OR South America OR Central America OR Mexico OR Guatemala OR Honduras OR Nicaragua OR Costa Rica OR Cuba OR Dominican Republic OR Panama OR Haiti OR Colombia OR Venezuela OR Guyana OR Suriname OR French Guiana OR Brazil OR Ecuador OR Peru OR Bolivia OR Paraguay OR Uruguay OR Chile OR Argentina)) AND IDIOMA: (English) AND TIPOS DE DOCUMENTO: (Article)  *Índices=SCI-EXPANDED, SSCI, A&HCI, CPCI-S, CPCI-SSH, ESCI Tempo estipulado=2002-2020* | 356.143 |
| 4 | 1 and 2 and 3 | 126 |
| 5 | Search on 03/19/2020 | |

Supplementary Data

**Table A10. Risk of bias in included studies (Joanna-Briggs Institute’s model).**

| **Question** | **Dozois, 2014** | **Gellati, 2013** | **Bonesso, 2014** | **Baba-Moussa, 2011** | **Furst, 2011** | **Souza, 2017** | **Espinosa de los Monteros, 2013** | **Egea, 2014** | **Sola, 2005** | **Pardo, 2013** | **Tomatis, 2018** |
| --- | --- | --- | --- | --- | --- | --- | --- | --- | --- | --- | --- |
| 1. Was the sample frame appropriate to address the target population? | Y | Y | Y | Y | Y | Y | Y | Y | Y | Y | Y |
| 2. Were study participants sampled in an appropriate way? | Y | Y | Y | Y | Y | N | Y | Y | Y | Y | Y |
| 3. Was the sample size adequate? | N | Y | Y | N | Y | N | N | Y | Y | Y | N |
| 4. Were the study subjects and the setting described in detail? | Y | Y | Y | Y | Y | Y | N | Y | N | N | N |
| 5. Was the data analysis conducted with sufficient coverage of the identified sample? | Y | Y | Y | U | Y | Y | Y | Y | NA | Y | Y |
| 6. Were valid methods used for the identification of the condition? | N | U | N | U | U | N | U | U | U | Y | U |
| 7. Was the condition measured in a standard, reliable way for all participants? | Y | Y | U | N | U | U | U | Y | U | U | U |
| 8. Was there appropriate statistical analysis? | Y | NA | Y | NA | Y | Y | N | NA | NA | NA | NA |
| 9. Was the response rate adequate, and if not, was the low response rate managed appropriately? | Y | Y | Y | Y | Y | Y | Y | Y | U | Y | U |
| Quality Score* | 78% | 67% | 78% | 44% | 78% | 55% | 44% | 78% | 33% | 67% | 33% |

N, No; U, Unclear; Y, Yes; NA, No Applicable.

*Score > 89%, high quality; score > 67%, media quality; score > 44%, low quality; score < 44%, very low quality.

**Table A11. Proportion of CO-SSTI in infections due to CG-MRSA**.

| Reference | Study period | No. of CG-MRSA infections | No. of CG-MRSA SSTI | **CG-MRSA+ (%) | CG-MRSA clone |
| --- | --- | --- | --- | --- | --- |
| Sola et al. (2008)1 | 2005 | 22 | 20 | 91% | Number of CG-MRSA isolates = 20  ST5-SCCmec IV |
| Egea et al. (2014)  (data from hospitalized patients)2 | 2009 | 105 * | 43 | 41% | Number of CG-MRSA isolates = 43  ST5-SCCmec IV  ST30-SCCmec IV |
| Tomatis et al.(2018)3 | 2013 | 11 | 10 | 91% | Number of CG-MRSA isolates = 10  ST30-SCCmec IV (50%)  ST5-SCCmec IV (50%) |

*CO*, community onset; *SSTI*, skin and soft tissue infection; *CG-MRSA* community-genotype methicillin-resistant *Staphylococcus aureus.*

* Number of patients.

** Confidence intervals were not described by the authors or were not calculated when determining the prevalence in studies without this information.

**Table A12. Risk factors associated with CG-MRSA CO-SSTI.**

| Reference | Study period | Risk factors (multivariate analysis) |
| --- | --- | --- |
| Furst et al. (2013)4 | 2010–2011 | Age < 50 years  AB: 2.39; 95% CI: 1.22, 4.70; p = 0.01  Purulent lesion  AB: 3.29; 95% CI: 1.67, 6.49; p = 0.0006 |
| Egea et al. (2014)2 | 2009 | Non-skin-related infection was related to HO-infections (compared with CO)  AB: 7.14; 95% CI: 1.12, 45.53; p = 0.038 |

*CO*, community onset; *SSTI*, skin and soft tissue infection; *CG-MRSA*,community-genotype methicillin-resistant *Staphylococcus aureus*; *OR*, odds ratio; *CI*, confidence interval.

**References**

1. Sola C., Saka HA., Vindel A., et al. Emergence and dissemination of a community-associated methicillin-resistant panton-valentine leucocidin-positive Staphylococcus aureus clone sharing the sequence type 5 lineage with the most prevalent nosocomial clone in the same region of Argentina. J Clin Microbiol. 2008;46(5):1826–31. Doi: 10.1128/JCM.01949-07.

2. Egea AL., Gagetti P., Lamberghini R., et al. New patterns of methicillin-resistant Staphylococcus aureus (MRSA) clones, community-associated MRSA genotypes behave like healthcare-associated MRSA genotypes within hospitals, Argentina. Int J Med Microbiol. 2014;304(8):1086–99. Doi: 10.1016/j.ijmm.2014.08.002.

3. Tomatis C., Baroni MR., Mendosa MA., et al. Tipos de spa no reportados en nuestro país en Staphylococcus aureus de pacientes adultos de un hospital escuela, Santa Fe, Argentina. Rev Argent Microbiol. 2018;50(3):244–8. Doi: 10.1016/j.ram.2017.09.001.

4. Furst MJL., de Vedia L., Fernández S., et al. Prospective multicenter study of community-associated skin and skin structure infections due to methicillin-resistant staphylococcus aureus in buenos aires, argentina. PLoS One. 2013;8(11):1–8. Doi: 10.1371/journal.pone.0078303.
